# Supplementary material
Source: PubMed Central journal article supplement (PMC8464352)
Supplement: mmc4.pdf [file mmc4.pdf]

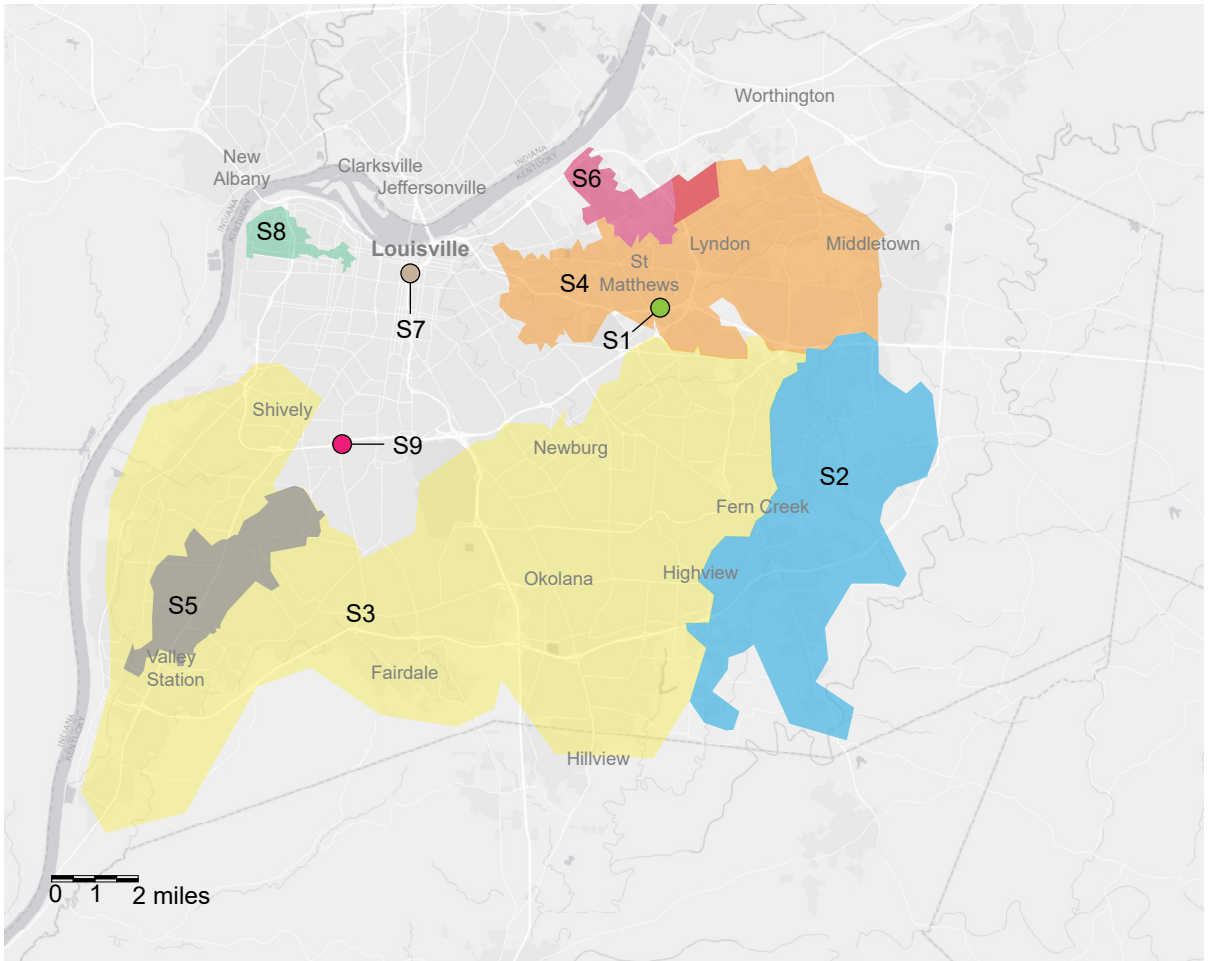

Supplementary Figure 1: Wastewater sampling catchments in Louisville (Kentucky), Sites 1 and 7 represent collection sites of hospitals and Site 9 is a sewer district facility.
